# Supplementary material for: P-type 3C-SiC nanowires and their optical and electrical transport properties
Source: Royal Society of Chemistry journal article supplement (doi:10.1039/c1cc10863h), 2011-01-01
Supplement: c1cc10863h.pdf [file c1cc10863h.pdf]

## Supporting Information

### P-type 3C-SiC nanowires and optical and electrical transport properties

Youqiang Chen,<sup>\*a,b</sup> Xinni Zhang,<sup>\*a,d</sup> Qing Zhao,<sup>\*c</sup> Li He<sup>c</sup>, Chengkuang Huang<sup>c</sup> and Zhipeng Xie<sup>d</sup>

<sup>a</sup> College of Physics Science, Qingdao University, Qingdao, 266071, P.R. China; E-mail: chen-yq06@mails.tsinghua.edu.cn and zhangxn06@mails.tsinghua.edu.cn

<sup>b</sup> Department of Chemistry, Tsinghua University, Beijing 100084, P. R. China.

<sup>c</sup> State Key Laboratory for Mesoscopic Physics, and Electron Microscopy Laboratory, School of Physics, Peking University, Beijing 100871, P.R.; E-mail: zhaoqing@pku.edu.cn

<sup>d</sup> State Key Lab of New Ceramics and Fine Processing, Tsinghua University, Beijing, 100084, P.R. China

#### Experimental Section:

Commercially available polysilazane (Ceraset, Kion, USA) was used as the raw material. The as-prepared Al-doped 3C-SiC NWs were grown by the following means. First, the polysilazane was solidified by heat-treatment at 260 °C for 30 min and then this was ground into a powder. Then, 0.4 wt% Al<sub>4</sub>C<sub>3</sub> was introduced as the additive into the powders, which were further ground, tailoring the doping level. The synthesis of three samples with different intentional Al doping concentrations at 2, 3.3 and 4.5 wt% has been tried and eventually realized by adding 0.4, 0.7 and 1 wt% Al<sub>4</sub>C<sub>3</sub> to the fine powder, respectively<sup>1</sup>. The obtained powder mixture was pyrolyzed at 1550 °C for 20 min in a conventional furnace with a graphite resistance heater under ultra-high purity Ar (99.99%) of 0.1 MPa at a flow rate of 200 sccm, followed by furnace cooling to ambient temperature. A graphite sheet with a thickness of ~ 1 mm was utilized as the substrate and located on the top of the alumina crucible.

#### Notes and references

1 F. Gao, W. Yang, H. Wang, Y. Fan, Z. Xie and L. An, *Cryst. Growth Des.*, 2008, **8**, 1461.
